# Supplementary material
Source: MDPI journal article supplement (https://www.mdpi.com/search?q=plants-11-01374)
Supplement: s001 [file plants-1642785-supplementary.pdf › plants-1642785-supplementary.pdf]

**Table S1.** Multilocus phylogeny parameters used in the study.

| Parameter                          | Details                        |
|------------------------------------|--------------------------------|
| Analysis*                          | PhyML                          |
| Model                              | GTR                            |
| Branch Support                     | Bootstrap with 1000 replicates |
| Nucleotide equilibrium frequencies | Empirical                      |
| Invariable sites                   | None                           |
| Across site rate variation         | Optimized, classes 4           |
| Tree searching operations          | NNI                            |
| Starting tree                      | BioNJ, Optimize tree topology  |

\* The analysis was performed with Seaview5 program only for *Diaporthe*, *Neofusicoccum* spp. (*ITS+tub-2+ACT*) and *Pestalotiopsis* spp. (*ITS+tub-2*) isolates obtained in the study along with reference species downloaded from NCBI nucleotide database.

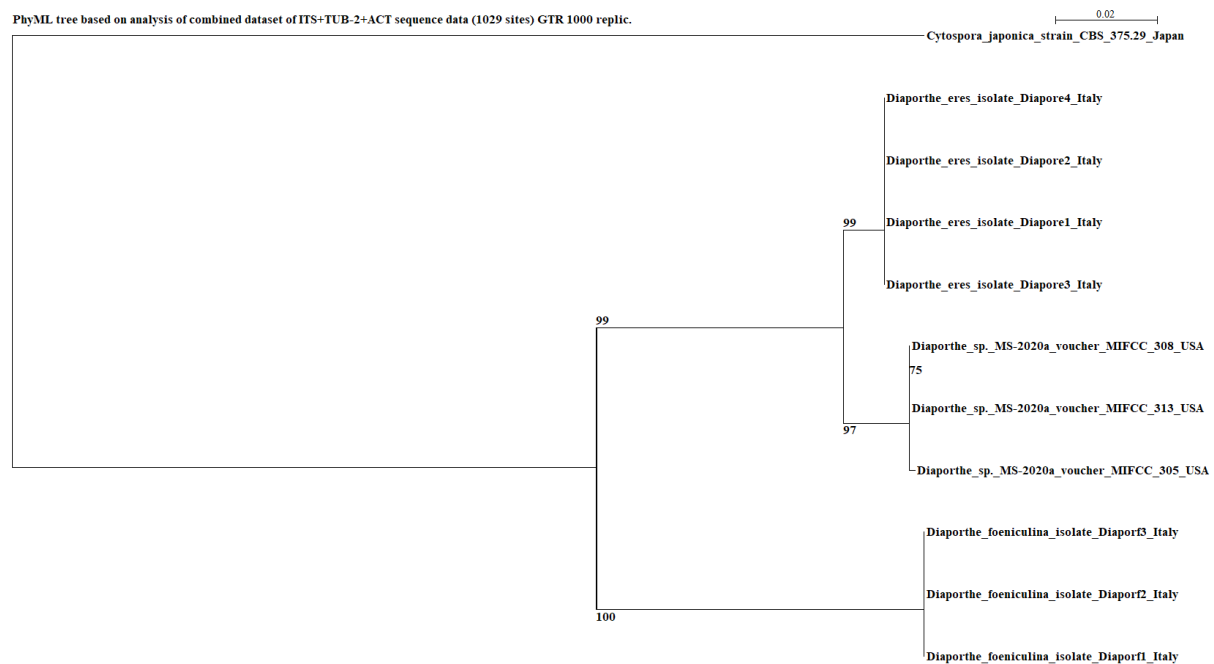

**Figure S1.**PhyML tree (ITS + tub-2 + ACT) for *Diaporthe* spp.

PhyML tree based on analysis of a combined dataset of ITS+TUB-2+ACT sequence data (1053 sites) GTR 1000 replic.

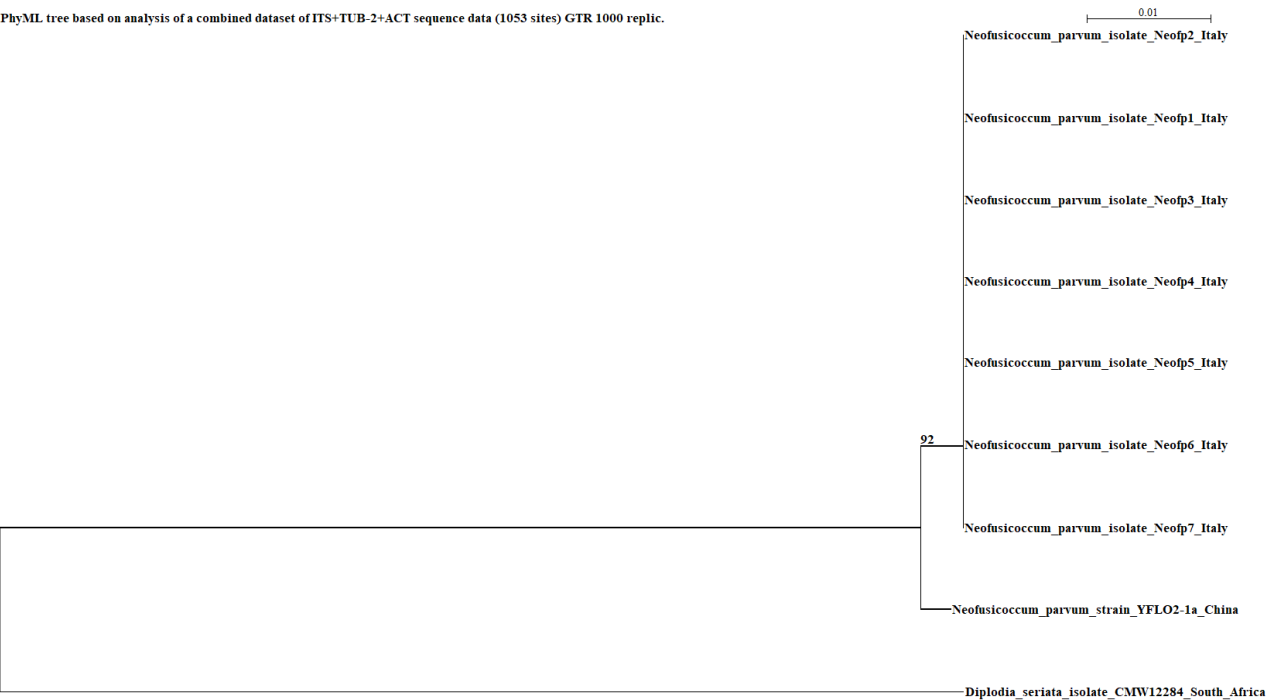

Figure S2. PhyML tree (ITS + tub-2 + ACT) for *Neofusicoccum* spp.

PhyML tree based on analysis of a combined dataset of ITS+TUB-2 sequences data (834 sites) GTR 1000 replic.

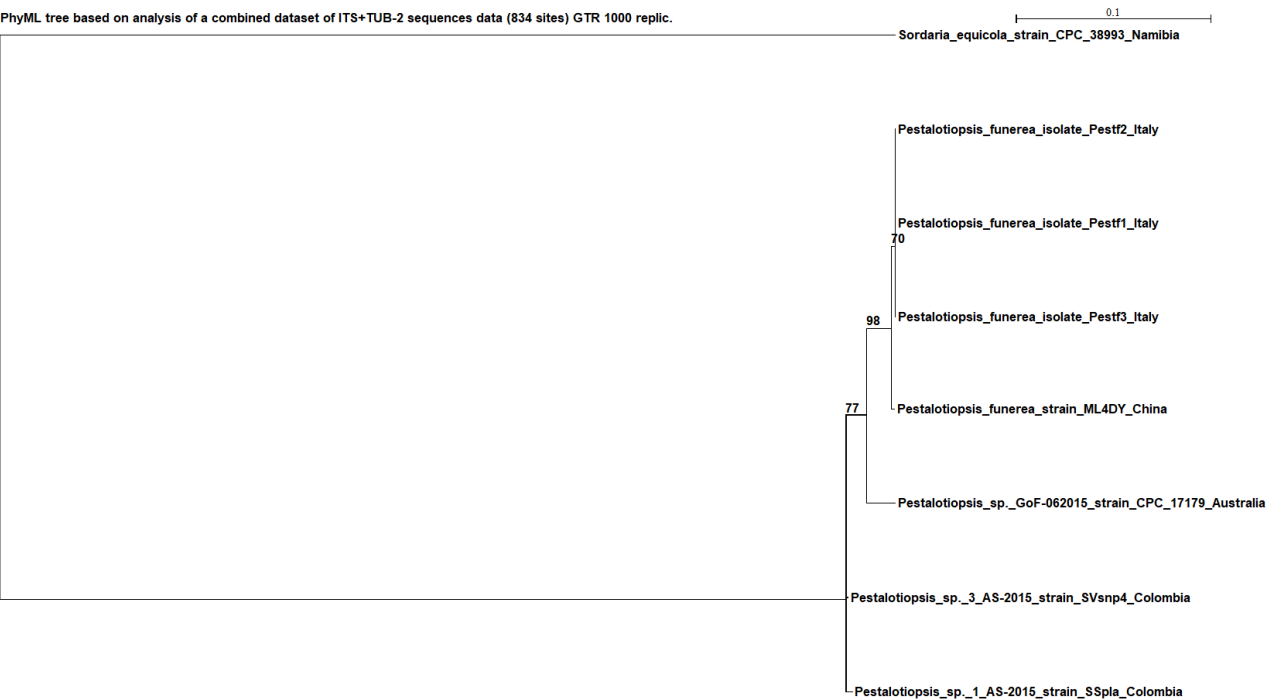

Figure S3. PhyML tree (ITS + tub-2) for *Pestalotiopsis* spp.
